# Supplementary material
Source: Springer Nature journal article supplement (https://www.springermedizin.de/resource/supplementary/12889_2011_3491_MOESM1_ESM.pdf/9489182)
Supplement: MOESM1 [file 9489182]

Professional  
engagement

Communication

Infrastructure

Trust, dialogue, transparency

Reporting of events that  
may be IHR-relevant

```
graph TD; A[Professional engagement] --> C[Trust, dialogue, transparency]; B[Communication] --> C; D[Infrastructure] --> C; C --> E[Reporting of events that may be IHR-relevant];
```
